# Supplementary material for: Fabrication of hierarchical CdS nanosphere via one-pot process for photocatalytic water splitting
Source: Springer Nature journal article supplement (doi:10.1007/s11051-015-2861-4), 2015-01-01
Supplement: MOESM1 [file 5665148]

***Electronic Supplementary Information***

**Fabrication of hierarchical CdS nanosphere via one-pot process for photocatalytic water splitting**

*Jinhua Xiong, Weiming Wu, Yuhao Liu, Lijuan Shen, Ling Wu**

*State key laboratory of photocatalysis on energy and environment,*

*Fuzhou University, Fuzhou 350002, P. R. China*

**Corresponding Author. E-mail:* [*wuling@fzu.edu.cn*](mailto:wuling@fzu.edu.cn)*;*


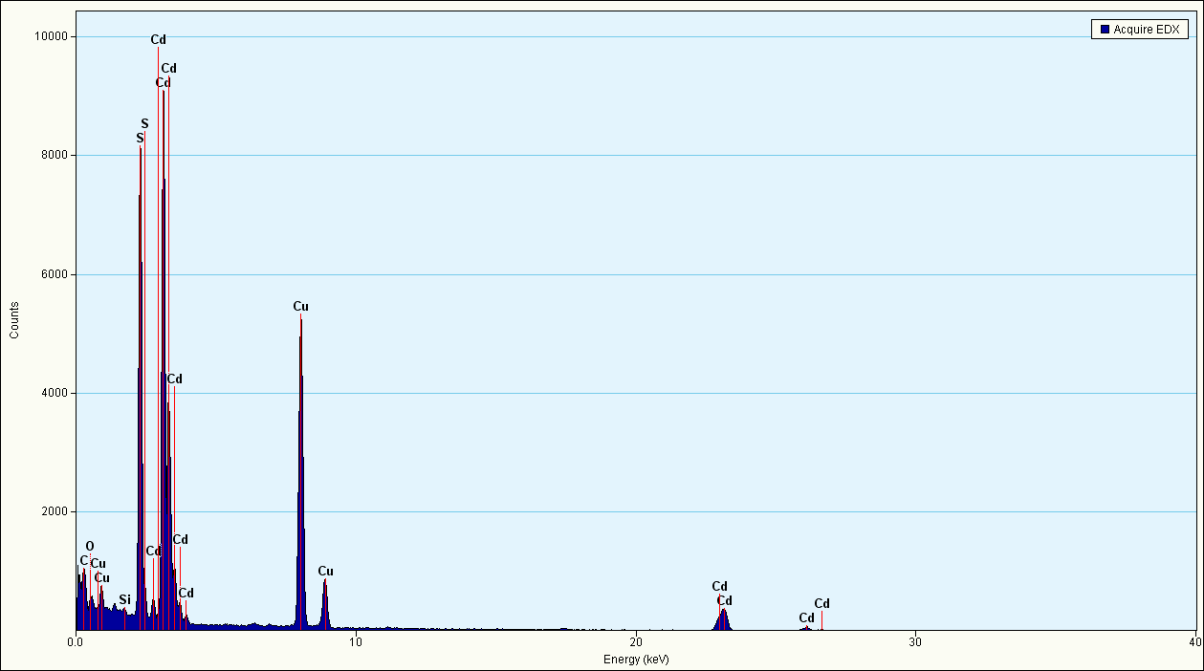


Fig. S1 EDX spectrum of the as-prepared hierarchical CdS with the ratio of Mo/Cd=0.3:1.40


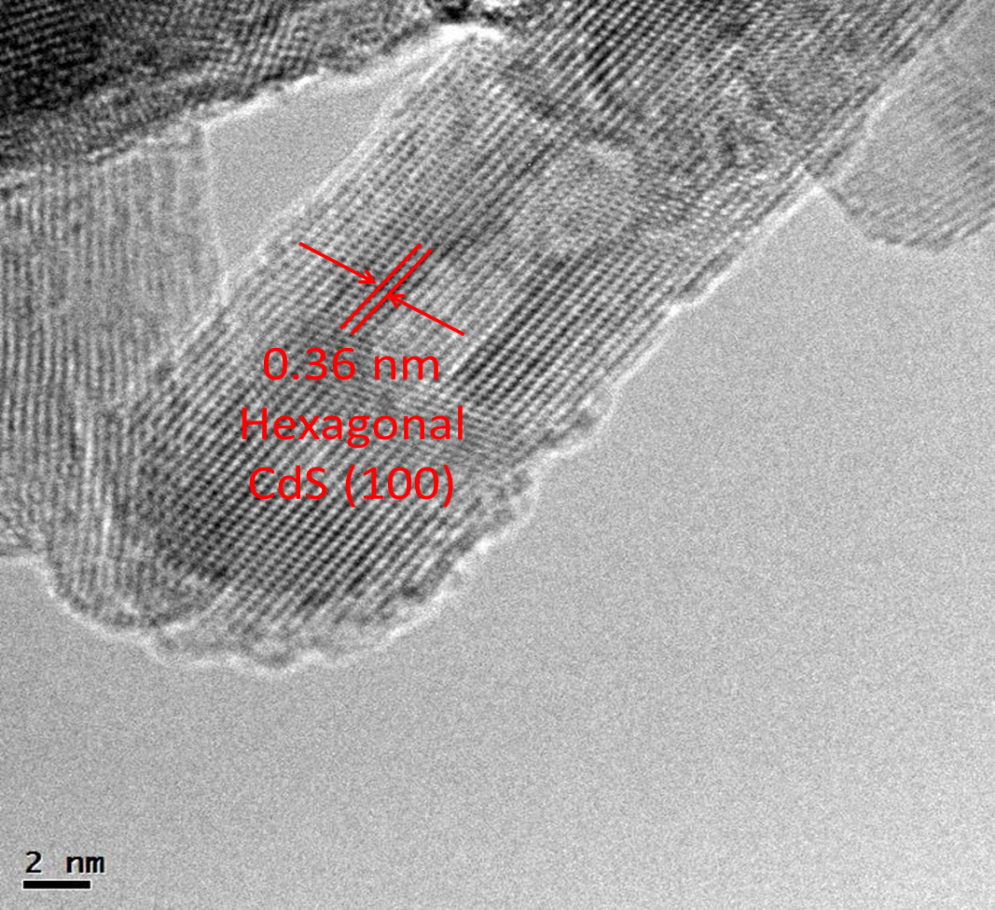


Fig. S2 High-resolution TEM image of the as-prepared hierarchical CdS with the ratio of Mo/Cd=0.3:1.40


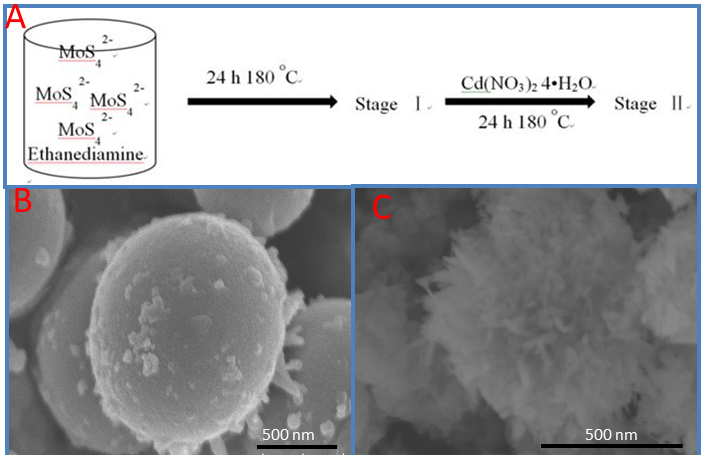


Fig. S3A) the control experiment process for verifying cation exchange reaction; B,C) SEM images of the product in stage Ⅰ and stage Ⅱ, respectively.

As shown in Fig. S3B and 3C, the as-prepared MoSx nanosphere in stage Ⅰ was transformed to hierarchical nanoparticle assembled by nanorobs, demonstrating the amorphous MoSx undergo a cation exchange reaction with Cd2+.





Fig. S4a) XRD patterns of the CdS derived from MoSx with Cd2+ exchanged; b)XRD patterns of the MoSx.


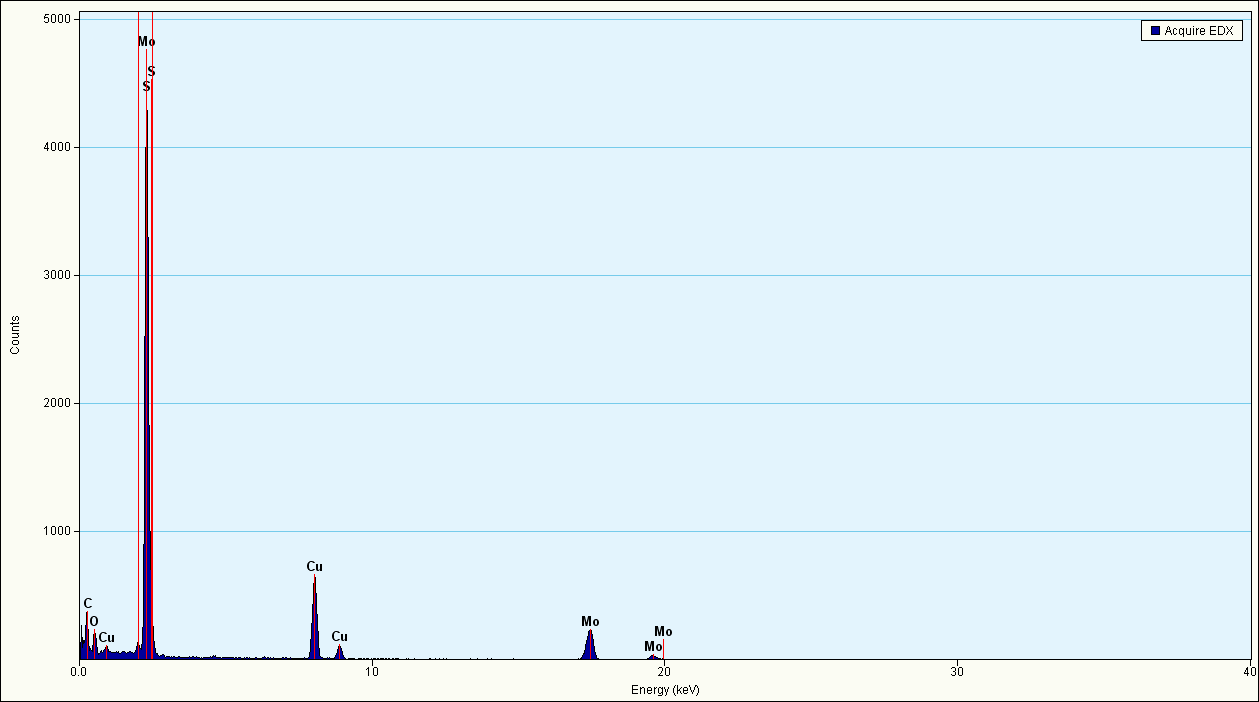


Fig. S5 EDX spectrum of the as-prepared MoSx nanosphere


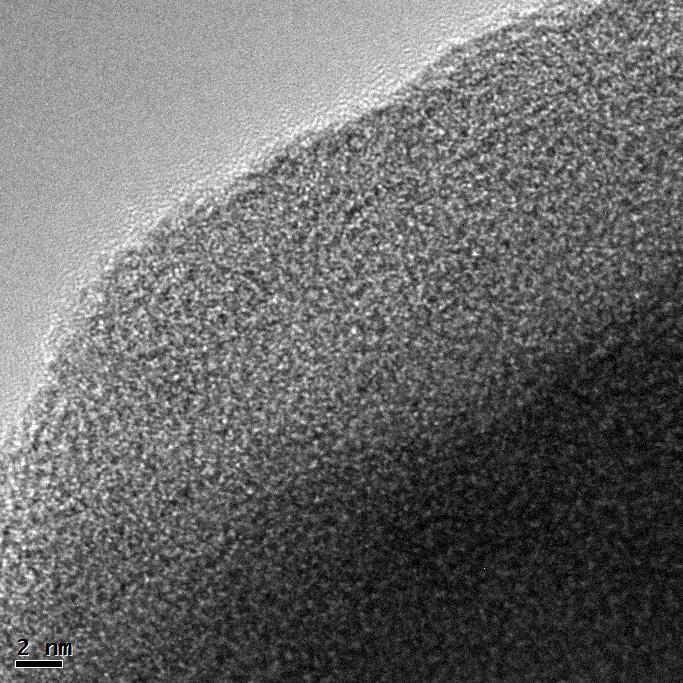

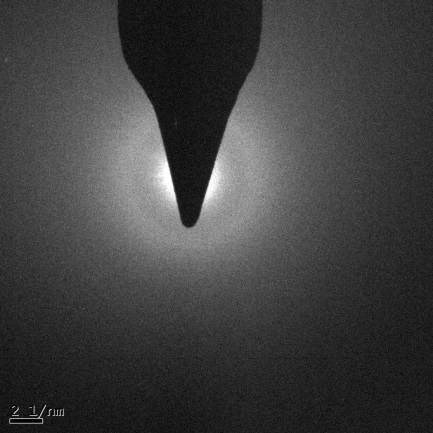


Fig. S6 HRTEM and SAED images of the MoSx nanosphere

Table S1 the elemental analysis of the products decided by ICP-OES

The origin mole ratio of Mo/Cd in sample 1-6 is 0.3:0.92, 0.3:1.07, 0.3:1.23, 0.3:1.40, 0.3:1.56, 0.3:1.87, respectively.

| **SAMPLE** | **1** | **2** | **3** | **4** | **5** | **6** |
| --- | --- | --- | --- | --- | --- | --- |
| Mo/Cd  %(wt） | 11.9% | 2.89% | 2.76% | 0.35% | 0.12% | 0.053% |

As shown in table S1, it can be seen that the percent of Mo/Cd in the as-prepared samples decrease with the increased dosage of Cd2+, demonstrating Mo was tend to exchanged completely. While, the residual Mo may result from the impurities.





Fig. S7 N2 adsorption-desorption isotherms of the samples synthesized by using different sulfur resource. The inset shows the BET surface area of the samples.





Fig. S8 XRD patterns of the as-prepared samples synthesized in different sulfur resource

As showing in Fig. S8, the CdS synthesized by using (NH4)2MoS4, thiourea and S as sulfur resource are all hexagonal, while the ratio of the intensity of (002)/(100) is 1.21, 1.08, 0.15, respectively. Additionly, the photocatalytic performance decreased as the incremental ratio of the intensity of (100)/(002), indicating that (002) may benefit the photocatalytic hydrogen production than (100).
